# Supplementary material for: Validation of an LC-MS/MS-based dilute-and-shoot approach for the quantification of > 500 mycotoxins and other secondary metabolites in food crops: challenges and solutions
Source: PubMed Central journal article supplement (PMC7136310; doi:10.1007/s00216-020-02489-9), 2020-02-20
Supplement: 216_2020_2489_MOESM1_ESM.pdf [file 216_2020_2489_MOESM1_ESM.pdf]

## **Analytical and Bioanalytical Chemistry**

### **Electronic Supplementary Material**

#### **Validation of an LC-MS/MS based dilute-and-shoot approach for the quantification of >500 mycotoxins and other secondary metabolites in food crops: challenges and solutions**

Michael Sulyok, David Stadler, David Steiner, Rudolf Krska

Additional files available under [10.1007/s00216-020-02489-9](https://doi.org/10.1007/s00216-020-02489-9)

**Fig. S1** Correlation of recoveries of extraction with retention time

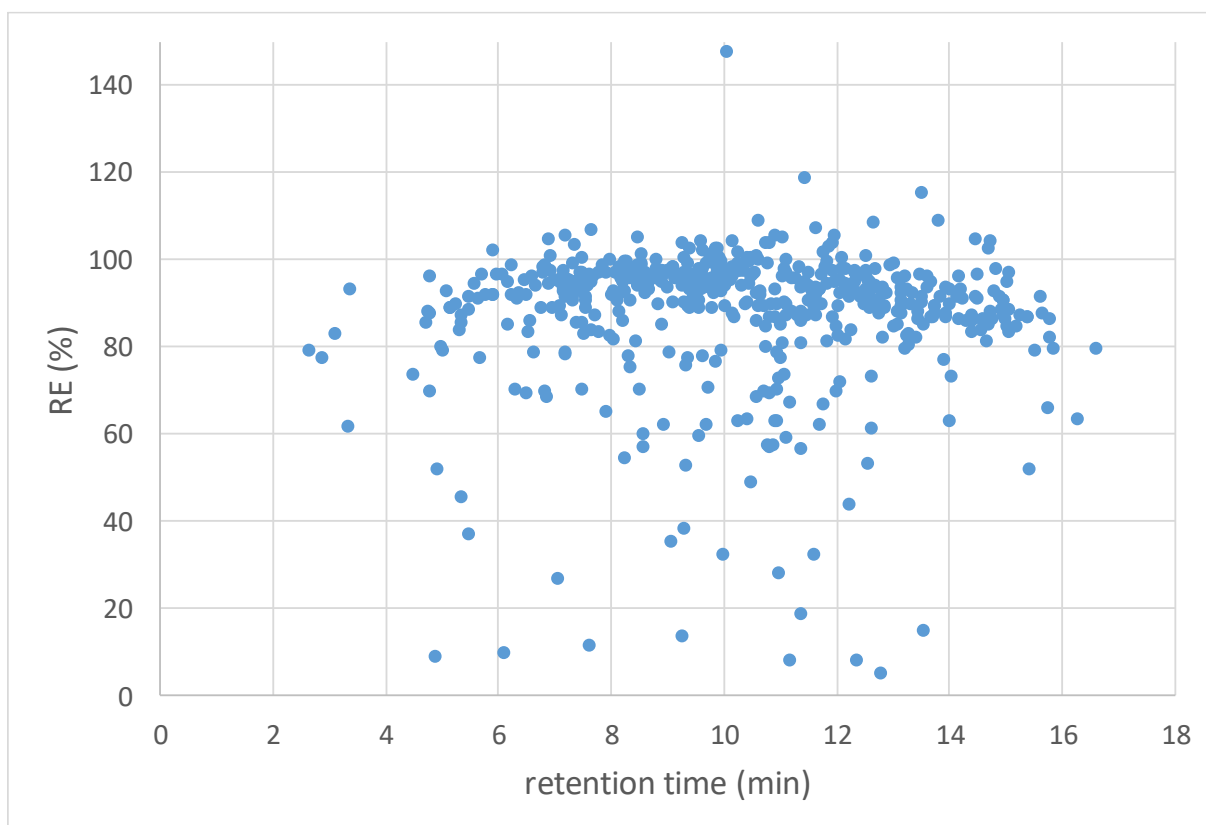

**Fig. S1a** Correlation of recoveries of extraction obtained in maize with retention time

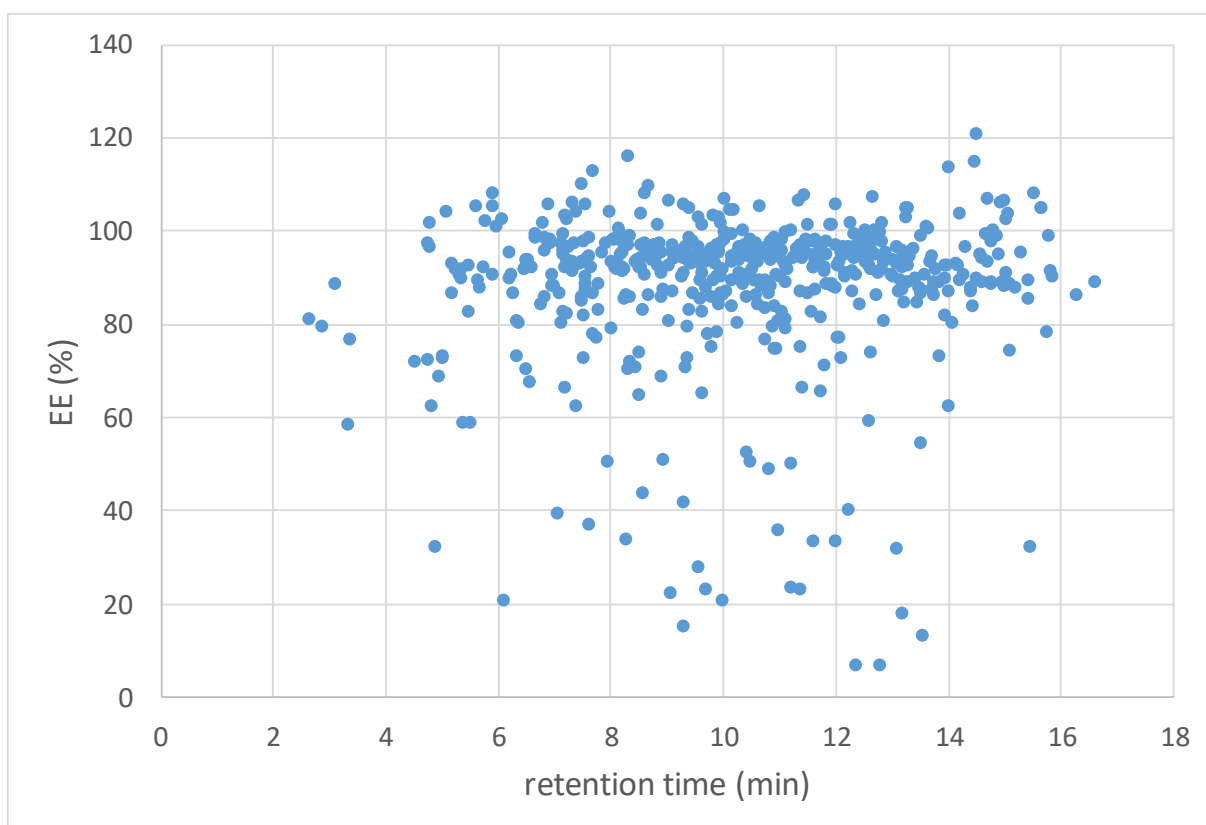

**Fig. S1b** Correlation of recoveries of extraction obtained in wheat with retention time

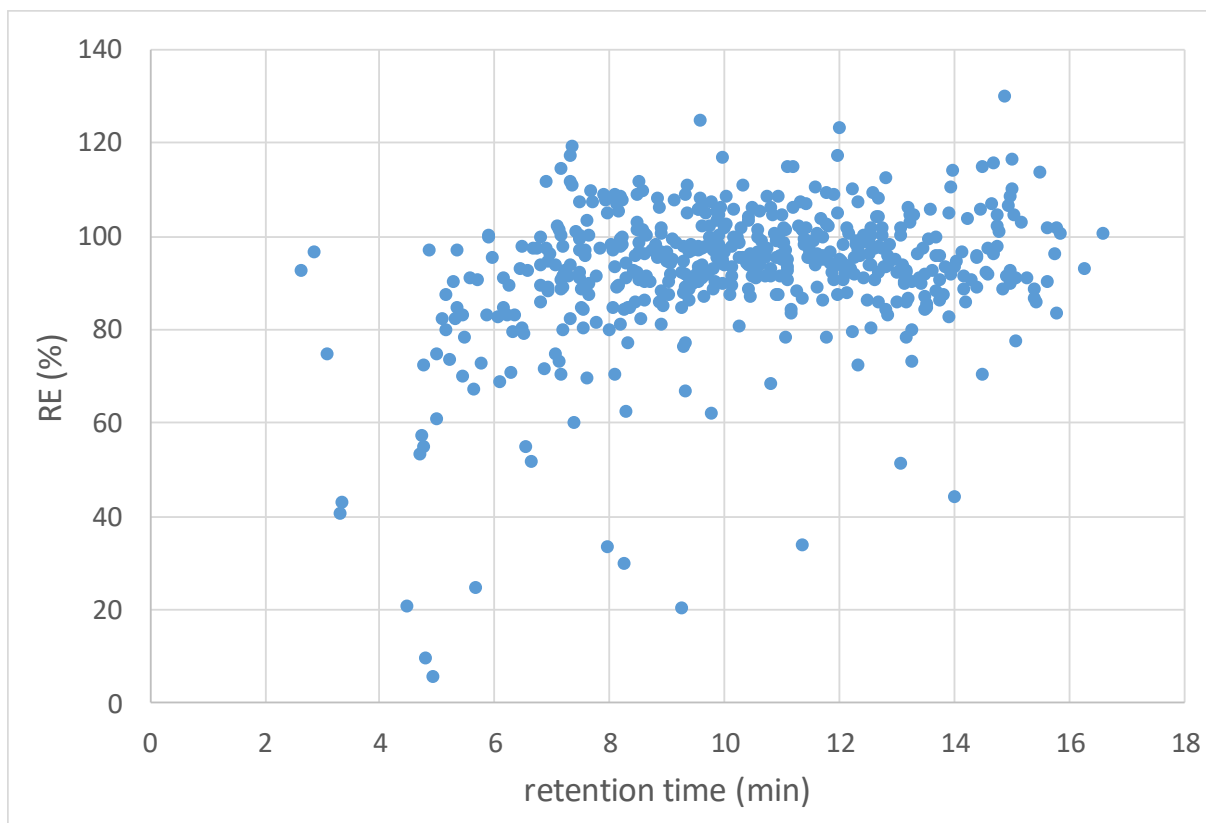

**Fig. S1c** Correlation of recoveries of extraction obtained in grapes with retention time

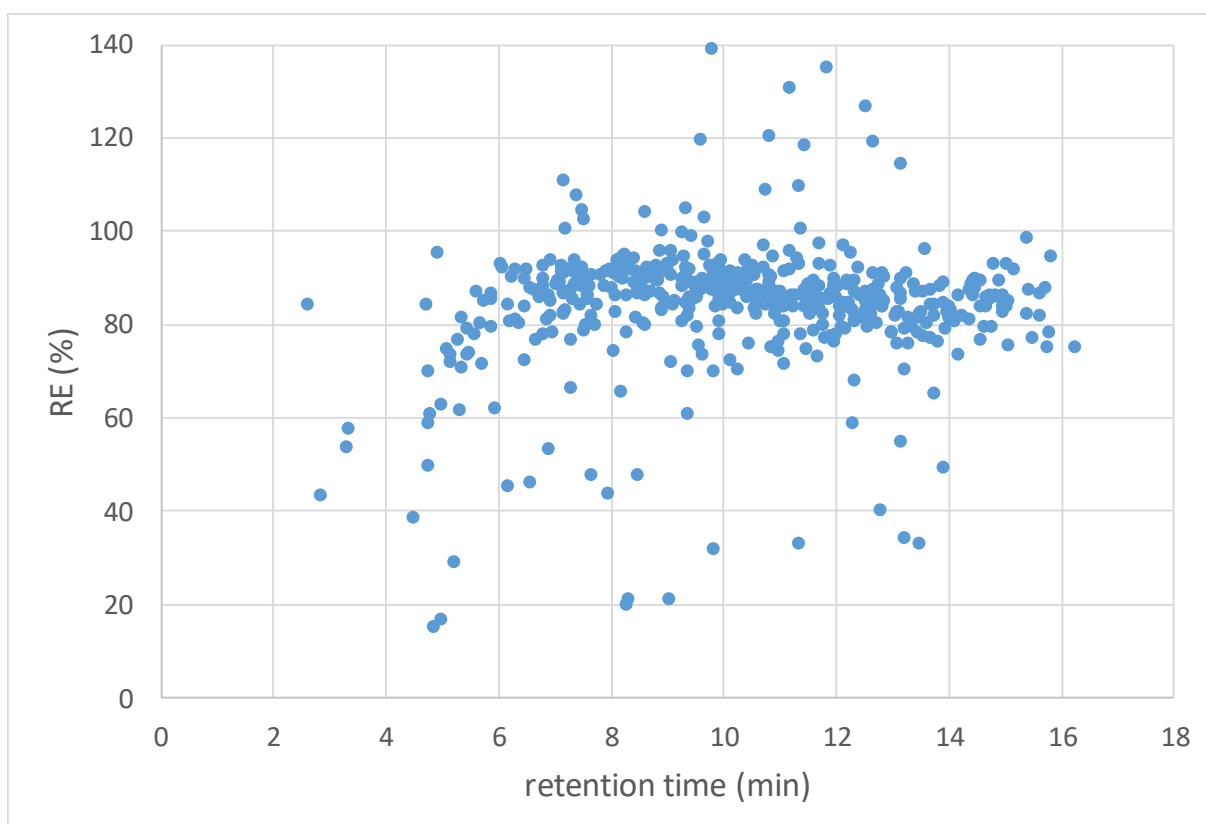

**Fig. S1d** Correlation of recoveries of extraction obtained in figs with retention time

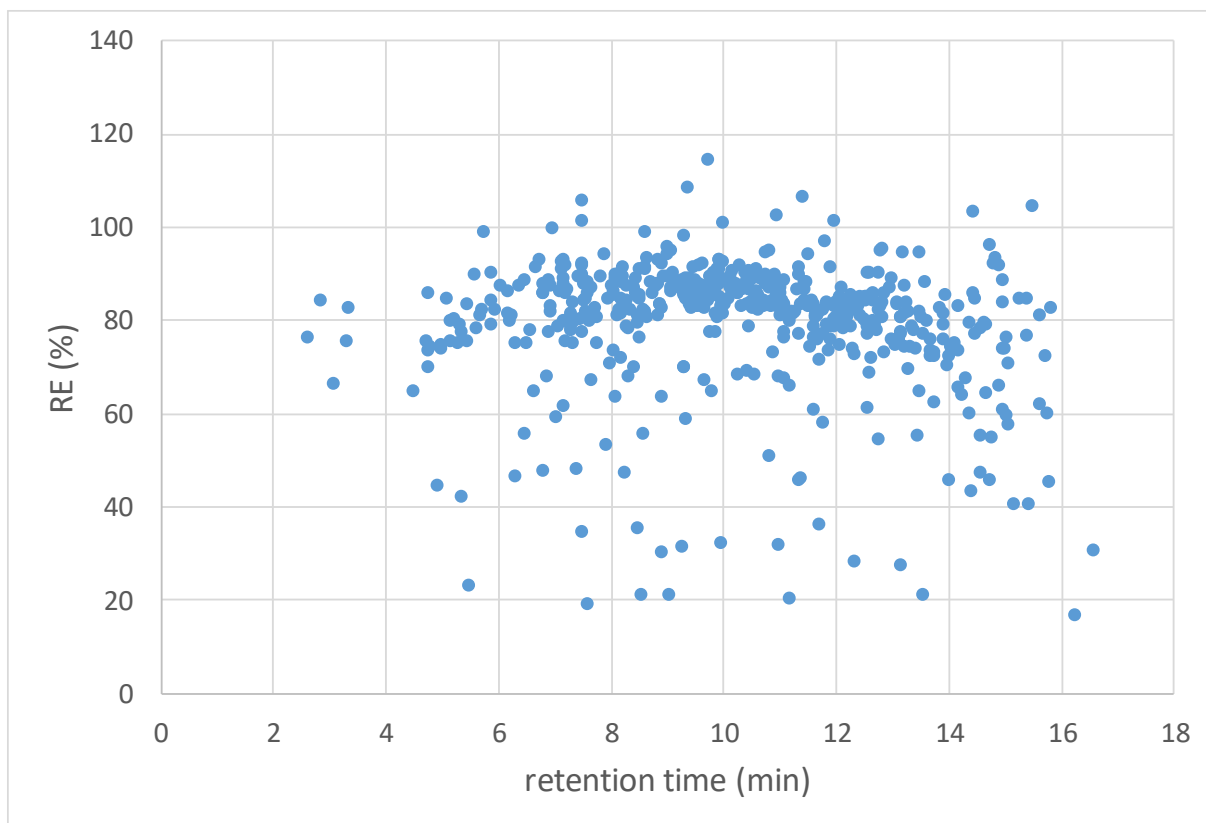

**Fig. S1e** Correlation of recoveries of extraction obtained in walnuts with retention time

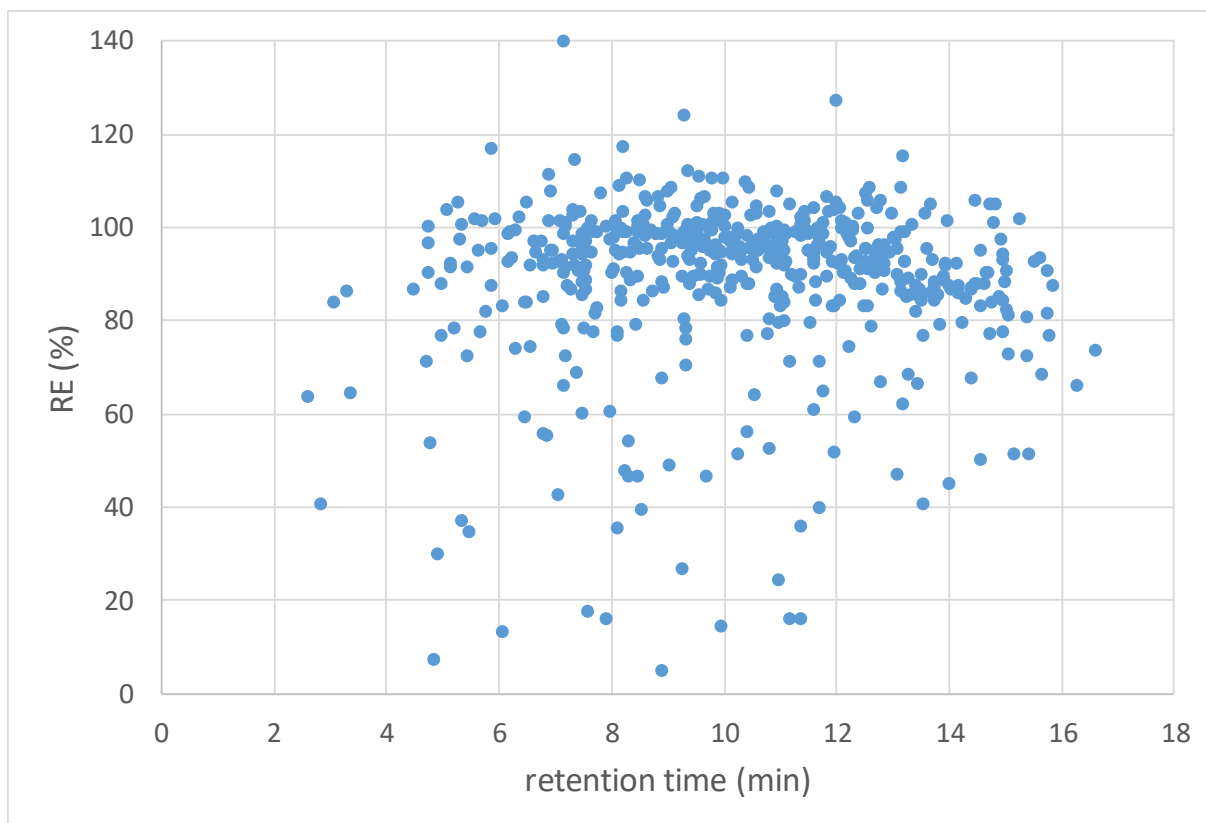

**Fig. S1f** Correlation of recoveries of extraction obtained in almonds with retention time
